# Supplementary material for: Molecular states of water in room temperature ionic liquidsElectronic Supplementary Information available. See http://www.rsc.org/suppdata/cp/b1/b106900d/
Source: Royal Society of Chemistry journal article supplement (doi:10.1039/b106900d), 2001-11-26
Supplement: additional.doc [file additional.doc]

**General**

Unless otherwise stated ALL reactions were conducted in an anaerobic atmosphere of nitrogen. Solvents were distilled from the relevant drying agents prior to use. Toluene was stood over Na and distilled (benzophenone used as a moisture indicator). Ethylacetate and dichloromethane were distilled from CaH2. 1-methylimidazole and 1,2-dimethylimidazole were distilled from KOH. 1,2,4,5-tetramethylimidazole was sublimed under vacuum prior to use. 1-chlorobutane and 1-iodobutane were washed with concentrated H2SO4 then distilled from P2O5. Chloride content of the ionic liquids was determined by a AgNO3 test. AgCl has a solubility of 1.4 mgl-1 in water, hence all of the ionic liquids synthesised will have a chloride content below this value.

**1-Butyl-3-methylimidazolium Chloride - [BMIM]Cl**

To a vigorously stirred solution of 1-methylimidazole (1.25 mol) in toluene (125 cm3) at 0oC was added 1-chlorobutane (144 cm3, 1.38 mol). The solution was heated to reflux at *ca*. 110oC for 24 hours, after which it was placed in a freezer at *ca*. –20oC for 12 hours. The toluene was decanted and the remaining viscous oil/semi-solid re-crystallized from acetonitrile and then repeated re-crystallized from ethylacetate to yield a white crystalline solid, which was dried *in vacuo* to give [BMIM]Cl in approximately 86 % yield. 1H-NMR(270 MHz, Chloroform-*d*) : 10.54 (1H, s, NCHN), 7.55 (1H, m, CH3NCHCHN), 7.40 (1H, m, CH3NCHCHN), 4.26 (2H, t, J=7.3 Hz, NCH2(CH2)2CH3), 4.11 (3H, s, NCH3), 1.82 (2H, m, NCH2CH2CH2CH3), 1.30 (2H, m, N(CH2)2CH2CH3), 0.89 (3H, t, J=7.3 Hz, N(CH2)3CH3). Mass spectrum(FAB +ve) m/z:139 (M-Cl)+

**1-Butyl-2,3-dimethylimidazolium Chloride - [BMMIM]Cl**

To a vigorously stirred solution of 1,2-dimethylimidazole (1.25 mol) in toluene (125 cm3) at 0oC was added 1-chlorobutane (144 cm3, 1.38 mol). The solution was heated to reflux at *ca*. 110oC for 24 hours, after which it was placed in a freezer at *ca*. –20oC for 12 hours. The toluene was decanted and the remaining viscous oil/semi-solid re-crystallized from acetonitrile and then repeatedly re-crystallized from ethylacetate to yield a white crystalline solid, which was dried *in vacuo* to give [BMMIM]Cl in 90 % yield. 1H-NMR (270 MHz, Chloroform-*d*) : 7.77 (1H, d, J=1.98 Hz, CH3NCHCHN), 7.49 (1H, d, J=1.98 Hz, CH3NCHCHN), 4.16 (2H, t, J=7.42 Hz, NCH2(CH2)2CH3), 3.98 (3H, s, NCH3), 2.75 (3H, s, NC(CH3)N), 1.74 (2H, m, NCH2CH2CH2CH3), 1.31 (2H, m, N(CH2)2CH2CH3), 0.88 (3H, t, J=7.30 Hz, N(CH2)3CH3,). Mass spectrum(FAB +ve) m/z:153 (M-Cl)+

**1-Butyl-3-methylimidazolium and 1-butyl-2,3-dimethylimidazolium ionic liquids**

[Anion] = PF6, BF4, ClO4, CF3CO2, CF3SO3, (CF3SO2)2N, SbF6, NO3

The respective metal salt (0.32 mol), required to give the desired ionic liquid, was added to a solution of either [BMIM]Cl or [BMMIM]Cl (0.29 mol) in dichloromethane and stirred for 24 hours. The suspension was filtered to remove the precipitated chloride salt and the organic phase repeatedly washed with small volumes of water (*ca.* 30 cm3) until no precipitation of AgCl occurred in the aqueous phase on addition of a concentrated AgNO3 solution. The organic phase was then washed a further two times with water to ensure complete removal of the chloride salt. The solvent was removed *in vacuo* and the resulting ionic liquid stirred with activated charcoal for 12 hours, after which the ionic liquid was passed through a short alumina column(s) (acidic and/or neutral) to give a colourless ionic liquid, which was dried at *ca*. 100oC *in vacuo* for *ca.* 24 hours or until no visible signs of water were present in the IR spectrum. Yields generally 70 to 80 %.

[BMIM][PF6]

Salt: NaPF6

1H-NMR(270 MHz, Chloroform-*d*) : 8.68 (1H, s, NCHN), 7.25 (1H, m, CH3NCHCHN), 7.10 (1H, m, CH3NCHCHN), 4.16 (2H, t, J=7.4 Hz, NCH2(CH2)2CH3), 3.94 (3H, s, NCH3), 1.86 (2H, m, NCH2CH2CH2CH3), 1.36 (2H, m, N(CH2)2CH2CH3), 0.95 (3H, t, J=7.3 Hz, N(CH2)3CH3). Mass spectrum(FAB +ve) m/z:139 (M-PF6)+

*[BMIM][BF4]*

Salt: NaBF4

1H-NMR(270 MHz, Chloroform-*d*) : 8.83 (1H, s, NCHN), 7.36 (1H, t, J=1.7 Hz, CH3NCHCHN), 7.31 (1H, t, J=1.7 Hz, CH3NCHCHN), 4.05 (2H, t, J=7.5 Hz, NCH2(CH2)2CH3), 3.81 (3H, s, NCH3), 1.67 (2H, m, NCH2CH2CH2CH3), 1.15 (2H, m, N(CH2)2CH2CH3), 0.73 (3H, t, J=7.3 Hz, N(CH2)3CH3).Mass spectrum(FAB +ve) m/z:139 (M-BF4)+

*[BMIM][ClO4]*

Salt: NaClO4

1H-NMR(270 MHz, Chloroform-*d*) : 8.89 (1H, s, NCHN), 7.33 (1H, s, CH3NCHCHN), 7.30 (1H, s, CH3NCHCHN), 4.19 (2H, t, J=7.4 Hz, NCH2(CH2)2CH3), 3.97 (3H, s, NCH3), 1.86 (2H, m, NCH2CH2CH2CH3), 1.36 (2H, m, N(CH2)2CH2CH3), 0.94 (3H, t, J=7.3 Hz, N(CH2)3CH3).Mass spectrum(FAB +ve) m/z:139 (M-ClO4)+

*[BMIM][(CF3SO2)2N]*

Salt: Li(CF3SO2)2N

1H-NMR(270 MHz, Chloroform-*d*) : 8.70 (1H, s, NCHN), 7.29 (2H, m, CH3NCHCHN), 4.14 (2H, t, J=7.4 Hz, NCH2(CH2)2CH3), 3.92 (3H, s, NCH3), 1.89 (2H, m, NCH2CH2CH2CH3), 1.34 (2H, m, N(CH2)2CH2CH3), 0.93 (3H, t, J=7.2 Hz, N(CH2)3CH3). Mass spectrum(FAB +ve) m/z:139 (M-(CF3SO2)2N)+

*[BMIM][CF3CO2]*

Salt: AgCF3CO2

1H-NMR(270 MHz, *d*6-Acetone) : 8.87 (1H, s, NCHN), 7.15 (1H, s, CH3NCHCHN), 7.04 (1H, s, CH3NCHCHN), 3.32 (2H, s, NCH2(CH2)2CH3), 3.05 (3H, s, NCH3), 0.83 (2H, m, NCH2CH2CH2CH3), 0.24 (2H, m, N(CH2)2CH2CH3), -0.19 (3H, m, N(CH2)3CH3). Mass spectrum(FAB +ve) m/z:139 (M-CF3CO 2)+

*[BMIM][CF3SO3]*

Salt: NaCF3SO3

1H-NMR(270 MHz, Chloroform-*d*) : 9.00 (1H, s, NCHN), 7.39 (1H, s, CH3NCHCHN), 7.37 (1H, s, CH3NCHCHN), 4.14 (2H, t, J=7.4 Hz, NCH2(CH2)2CH3), 3.09 (3H, s, NCH3), 1.80 (2H, m, NCH2CH2CH2CH3), 1.30 (2H, m, N(CH2)2CH2CH3), 0.87 (3H, t, J=7.3 Hz, N(CH2)3CH3). Mass spectrum(FAB +ve) m/z:139 (M-(CF3SO3)+

*[BMIM][NO3]*

Salt: AgNO3

1H-NMR (270 MHz, Chloroform-*d*) : 9.62 (1H, s, NCHN), 7.45 (1H, m, CH3NCHCHN), 7.40 (1H, m, CH3NCHCHN), 4.12 (2H, t, J=7.3 Hz, NCH2(CH2)2CH3), 3.88 (3H, s, NCH3), 1.74 (2H, m, NCH2CH2CH2CH3), 1.22 (2H, m, N(CH2)2CH2CH3), 0.80 (3H, t, J=7.4 Hz, N(CH2)3CH3). Mass spectrum (FAB +ve) m/z: 153 (M-NO3)+

*[BMIM][SbF6]*

Salt: NaSbF6

1H-NMR (270 MHz, DMSO-*d*6) : 9.07 (1H, s, NCHN), 7.73 (1H, m, CH3NCHCHN), 7.66 (1H, m, CH3NCHCHN), 4.15 (2H, t, J=7.2 Hz, NCH2(CH2)2CH3), 3.84 (3H, s, NCH3), 1.76 (2H, m, NCH2CH2CH2CH3), 1.25 (2H, m, N(CH2)2CH2CH3), 0.89 (3H, t, J=7.3 Hz, N(CH2)3CH3). Mass spectrum (FAB +ve) m/z: 153 (M-SbF6)+

*[BMMIM][PF6]*

Salt: NaPF6

1H-NMR (270 MHz, DMSO-*d*6) : 7.62 (1H, m, CH3NCHCHN), 7.60 (1H, m, CH3NCHCHN), 4.10 (2H, t, J=7.3 Hz, NCH2(CH2)2CH3), 3.74 (3H, s, NCH3), 2.57 (3H, s, NC(CH3)N), 1.69 (2H, m, NCH2CH2CH2CH3), 1.28 (2H, m, N(CH2)2CH2CH3), 0.90 (3H, t, J=7.3 Hz, (N(CH2)3CH3,). Mass spectrum (FAB +ve) m/z: 153 (M-PF6)+

*[BMMIM][BF4]*

Salt: NaBF4

1H-NMR (270 MHz, DMSO-*d*6) : 7.54 (2H, m, CH3NCHCHN), 4.10 (2H, m, NCH2(CH2)2CH3), 3.79 (3H, s, NCH3), 2.57 (3H, s, NC(CH3)N), 1.69 (2H, m, NCH2CH2CH2CH3), 1.27 (2H, m, N(CH2)2CH2CH3), 0.88 (3H, m, (N(CH2)3CH3,). Mass spectrum(FAB +ve) m/z:153 (M-BF4)+

[BMMIM][(CF3SO2)2N]

Salt: Li(CF3SO2)2N

1H-NMR (270 MHz, Chloroform-*d*) : 7.20 (1H, s, CH3NCHCHN), 7.18 (1H, s, CH3NCHCHN), 4.05 (2H, t, J=7.4 Hz, NCH2(CH2)2CH3), 3.79 (3H, s, NCH3), 2.60 (3H, s, NC(CH3)N), 1.78 (2H, m, NCH2CH2CH2CH3), 1.37 (2H, m, N(CH2)2CH2CH3), 1.03 (3H, t, J=7.4 Hz, (N(CH2)3CH3,). Mass spectrum(FAB +ve) m/z:153 (M-(CF3SO2)2N)+

**1-Butyl-2,3,4,5-tetramethylimidazolium Iodide - [B(M)4IM][I]**

To a vigorously stirred solution of 1,2,4,5-tetramethylimidazole (25 g, 0.201 mol) in toluene (100 cm3) was added 1-iodobutane (27.5 cm3, 0.242 mol). The solution was heated to reflux at *ca*. 110oC for 24 hours, after which it was placed in a freezer at *ca*. –20oC for 12 hours. The toluene was decanted and the remaining viscous oil/semi-solid repeatedly re-crystallized from ethylacetate to yield an off-white semi-crystalline solid, which was dried *in vacuo* to give [B(M)4IM]I in approximately 85% yield, which was stored in the dark. 1H-NMR (270 MHz, Chloroform-*d*) : 4.02 (2H, t, J=7.8 Hz, NCH2(CH2)2CH3), 3.77 (3H, s, NCH3), 2.79 (3H, s, NC(CH3)N), 2.19 (3H, s, CH3NC(CH3)C(CH3)N), 2.17 (3H, s, CH3NC(CH3)C(CH3)N), 1.60 (2H, m, NCH2CH2CH2CH3), 1.32 (2H, m, N(CH2)2CH2CH3), 0.89 (3H, t, J=7.3 Hz, (N(CH2)3CH3,). Mass spectrum(FAB +ve) m/z:181 (M-I)+

**1-Butyl-2,3,4,5-tetramethylimidazolium [B(M)4IM] Salts**

[Anion] = PF6, BF4, (CF3SO2)2N

The respective metal salt (53.5 mmol), required to give the desired ionic salt/liquid, was added to a solution of [B(M)4IM]I (15g, 48.6 mmol) in dichloromethane and stirred for 24 hours. The suspension was filtered to remove the precipitated chloride salt and the organic phase reduced *in vacuo*, which was then re-dissolved in diethylether and repeatedly washed with small volumes of water (*ca.* 30 cm3) until no precipitation of AgCl occurred in the aqueous phase on addition of a concentrated AgNO3 solution. The organic phase was then washed a further two times with water to ensure complete removal of the chloride salt. Yields generally 70 to 80 %.

[B(M4)IM][PF6]

Salt: NaPF6

The Ethereal solution was reduced, and the resulting solid repeatedly re-crystallized with ethylacetate to give [B(M4)IM][PF6] as an off-white semi-crystalline solid.

1H-NMR (270 MHz, Chloroform-*d*) : 3.95 (2H, t, J=7.8 Hz, NCH2(CH2)2CH3), 3.63 (3H, s, NCH3), 2.60 (3H, s, NC(CH3)N), 2.19 (6H, s, CH3NC(CH3)C(CH3)N), 1.65 (2H, m, NCH2CH2CH2CH3), 1.36 (2H, m, N(CH2)2CH2CH3), 0.95 (3H, t, J=7.7 Hz, (N(CH2)3CH3,). Mass spectrum (FAB +ve) m/z: 181 (M-PF6)+

*[B(M)4IM][BF4]*

Salt: NaBF4

The Ethereal solution was reduced, and the resulting solid repeatedly re-crystallized with ethylacetate to give [B(M4)IM][BF4] as a powdery yellow solid.

1H-NMR (270 MHz, Chloroform-*d*) : 3.94 (2H, t, J=7.8 Hz, NCH2(CH2)2CH3), 3.62 (3H, s, NCH3), 2.58 (3H, s, NC(CH3)N), 2.18 (6H, s, CH3NC(CH3)C(CH3)N), 1.63 (2H, m, NCH2CH2CH2CH3), 1.35 (2H, m, N(CH2)2CH2CH3), 0.93 (3H, t, J=7.3 Hz, (N(CH2)3CH3,). Mass spectrum (FAB +ve) m/z: 181 (M-BF4)+

[B(M)4IM][(CF3SO2)2N]

Salt: Li(CF3SO2)2N

The Ethereal solution was reduced, to give [B(M4)IM][(CF3SO2)2N] as a very viscous dark orange tar.

1H-NMR (270 MHz, DMSO-*d*6) : 4.04 (2H, t, J=7.7 Hz, NCH2(CH2)2CH3), 3.59 (3H, s, NCH3), 2.58 (3H, s, NC(CH3)N), 2.22 (3H, s, CH3NC(CH3)C(CH3)N), 2.19 (3H, s, CH3NC(CH3)C(CH3)N), 1.58 (2H, m, NCH2CH2CH2CH3), 1.31 (2H, m, N(CH2)2CH2CH3), 0.90 (3H, t, J=7.3 Hz, (N(CH2)3CH3,). Mass spectrum (FAB +ve) m/z: 181 (M-(CF3SO2)2N)+
